# Supplementary material
Source: PubMed Central journal article supplement (PMC9381025)

# THE LANCET

## Rheumatology

### Supplementary appendix

This appendix formed part of the original submission and has been peer reviewed. We post it as supplied by the authors.

Supplement to: Risk M, Hayek SS, Schioppa E, et al. COVID-19 vaccine effectiveness against omicron (B.1.1.529) variant infection and hospitalisation in patients taking immunosuppressive medications: a retrospective cohort study. *Lancet Rheumatol* 2022; published online Aug 16. [https://doi.org/10.1016/S2665-9913\(22\)00216-8](https://doi.org/10.1016/S2665-9913(22)00216-8).

# Supplement

## TABLE OF CONTENTS

|                                                                                                                        |    |
|------------------------------------------------------------------------------------------------------------------------|----|
| Identification of Outcomes .....                                                                                       | 2  |
| Table S1. Medication List .....                                                                                        | 3  |
| Table S2. Medication Frequency Table by Type .....                                                                     | 4  |
| Table S3. Results from Cox Regression for Vaccine Efficacy against Infection, Immunocompetent Individuals .....        | 5  |
| Table S4. Results from Cox Regression for Vaccine Efficacy against Infection, Immunosuppressed Individuals .....       | 6  |
| Table S5. Results from Cox Regression for Vaccine Efficacy against Hospitalisation, Immunocompetent Individuals .....  | 7  |
| Table S6. Results from Cox Regression for Vaccine Efficacy against Hospitalisation, Immunosuppressed Individuals ..... | 8  |
| Table S7. Results from Cox Regression for Medication Type and Infection Risk .....                                     | 9  |
| Table S8. Results from Cox Regression for Medication Type and Hospitalisation Risk .....                               | 10 |
| Table S9. Results from Cox Regression for Vaccine Efficacy against ICU Admission, All Patients .....                   | 11 |
| Table S10. Characteristics of Infected Patients .....                                                                  | 12 |
| Table S11. Characteristics of Hospitalized Patients .....                                                              | 13 |
| Figure S1. Unweighted Balance for all Covariates .....                                                                 | 14 |
| Figure S2. Weighted Balance for all Covariates .....                                                                   | 15 |

## **IDENTIFICATION OF OUTCOMES**

### **ICD-10 Code Descriptions**

- U07.1 - COVID-19, Virus identified

### **Infection Criteria**

A patient was identified as having a SARS-CoV-2 infection after full vaccination if they had a positive SAR-CoV-2 PCR laboratory test result or U07.1 ICD-10 code. Where a patient had a positive SARS-CoV-2 PCR laboratory test, the collection date was used as the date of infection. For a reinfection to occur, the collection date or U07.1 code date was required to be:

1. At least 90 days from any previously identified infection
2. At least 14 days from any previous U07.1 code or positive SAR-CoV-2 PCR laboratory test result

The first criterion was used in accordance with CDC guidelines that states that covid-positive individuals should not test for 90 days after initial diagnosis, as many individuals continue to test positive for a long period of time after recovery from COVID-19. The second criterion was used as U07.1 was sometimes incorrectly used on an ongoing basis for patients who were hospitalised with COVID-19 for a substantial period of time.

### **Hospitalization Criteria**

Hospitalisation was determined based on chart reviewed data, only including hospitalisation where COVID-19 was the primary reason for hospitalisation.

**Table S1. Medication List**

| <b>Immunosuppressive DMARDs</b> | <b>Immunomodulatory DMARDs</b> | <b>Glucocorticoids</b>     |
|---------------------------------|--------------------------------|----------------------------|
| Daclizumab                      | Imatinib mesylate              | Dexamethasone              |
| Ocrelizumab                     | Nintedanib                     | Hydrocortisone             |
| Satralizumab                    | Pirfenidone                    | Methylprednisolone         |
| Efalizumab                      | Bosutinib                      | Prednisolone               |
| Abatacept                       | Dasatinib                      | Prednisone                 |
| Anifrolumab                     | Nilotinib                      | Prednisone delayed-release |
| Basiliximab                     | Apremilast                     |                            |
| Belatacept                      | Sulfasalazine                  |                            |
| Adalimumab                      | Mesalazine                     |                            |
| Belatacept                      | Mesalamine                     |                            |
| Belimumab                       | Olsalazine                     |                            |
| Bimekizumab                     | Balsalazide                    |                            |
| Brodalumab                      | 5-ASA                          |                            |
| Certolizumab pegol              | 5-aminosalicylic acid          |                            |
| Dupilumab                       | Pomalidomide                   |                            |
| Etanercept                      | Chloroquine                    |                            |
| Golimumab                       | Dapsone                        |                            |
| Guselkumab                      | Hydroxychloroquine             |                            |
| Infliximab                      | Lenalidomide                   |                            |
| Ixekizumab                      | Thalidomide                    |                            |
| Natalizumab                     |                                |                            |
| Risankizumab                    |                                |                            |
| Rituximab                       |                                |                            |
| Sarilumab                       |                                |                            |
| Secukinumab                     |                                |                            |
| Tildrakizumab                   |                                |                            |
| Tocilizumab                     |                                |                            |
| Ustekinumab                     |                                |                            |
| Vedolizumab                     |                                |                            |
| Alemtuzumab                     |                                |                            |
| Ofatumumab                      |                                |                            |
| Belantamab mafodotin            |                                |                            |
| Daratumumab                     |                                |                            |
| Elotuzumab                      |                                |                            |
| Idecabtagene vicleucel          |                                |                            |
| Isatuximab                      |                                |                            |
| Mepolizumab                     |                                |                            |
| Anakinra                        |                                |                            |
| Canakinumab                     |                                |                            |
| Avacopan                        |                                |                            |
| Apremilast                      |                                |                            |
| Baricitinib                     |                                |                            |
| Tofacitinib                     |                                |                            |
| Upadacitinib                    |                                |                            |
| Ponatinib                       |                                |                            |
| Penicillamine                   |                                |                            |
| Sodium aurothiomalate           |                                |                            |
| Azathioprine                    |                                |                            |
| 6-mercaptopurine                |                                |                            |
| Voclosporin                     |                                |                            |
| Carfilzomib                     |                                |                            |
| Bortezomib                      |                                |                            |
| Sirolimus                       |                                |                            |
| Everolimus                      |                                |                            |
| Mycophenolate Mofetil           |                                |                            |
| Mycophenolic acid               |                                |                            |
| Tacrolimus                      |                                |                            |
| Cyclophosphamide                |                                |                            |
| Cyclosporine                    |                                |                            |
| Leflunomide                     |                                |                            |
| Methotrexate                    |                                |                            |
| Doxorubicin                     |                                |                            |
| Melphalan flufenamide           |                                |                            |
| Panobinostat                    |                                |                            |
| Selinexor                       |                                |                            |
| Melphalan                       |                                |                            |
| Carmustine                      |                                |                            |

**Table S2. Medication Frequency Table by Type\***

| <b>Immunosuppressive DMARDs [No. (%)]</b> | <b>Immunomodulatory DMARDs [No. (%)]</b> | <b>Glucocorticoids [No. (%)]</b> |
|-------------------------------------------|------------------------------------------|----------------------------------|
| Methotrexate [753 (19·6)]                 | Hydroxychloroquine [850 (51·9)]          | Prednisone [4428 (72·8)]         |
| Mycophenolate Mofetil [527 (13·7)]        | Mesalamine [414 (25·3)]                  | Dexamethasone [726 (11·9)]       |
| Tacrolimus [412 (10·7)]                   | Sulfasalazine [222 (13·6)]               | Methyl Prednisolone [721 (11·8)] |
| Azathioprine [379 (9·9)]                  | Balsalazide [52 (3·2)]                   | Hydrocortisone [194 (3·2)]       |
| Infliximab [291 (7·6)]                    | Nintedanib [40 (2·4)]                    | All Others [16 (0·3)]            |
| Etanercept [178 (4·6)]                    | Imatinib Mesylate [24 (1·4)]             |                                  |
| Adalimumab [168 (4·4)]                    | All Others [35 (2·0)]                    |                                  |
| Ustekinumab [155 (4·0)]                   |                                          |                                  |
| Leflunomide [136 (3·5)]                   |                                          |                                  |
| Vedolizumab [102 (2·7)]                   |                                          |                                  |
| Rituximab [100 (2·6)]                     |                                          |                                  |
| Dupilimab [94 (2·5)]                      |                                          |                                  |
| Tocilizumab [77 (2·0)]                    |                                          |                                  |
| Cyclosporine [69 (1·8)]                   |                                          |                                  |
| Tofacitinib [65 (1·7)]                    |                                          |                                  |
| Ocrelizumab [61 (1·6)]                    |                                          |                                  |
| Abatacept [48 (1·2)]                      |                                          |                                  |
| All Others [219 (5·7)]                    |                                          |                                  |

\*Medications comprising at least 1% of prescriptions within a given type listed. If a patient had multiple prescriptions for a single medication, only one was counted.

**Table S3. Results from Cox Regression for Vaccine Efficacy against Infection, Immunocompetent Individuals\***

| Variable                                            | HR (95% CI)      | P-Value | No. Events               |
|-----------------------------------------------------|------------------|---------|--------------------------|
| Vaccine (Reference Group: Unvaccinated)             |                  |         | (Ref <sup>§</sup> : 908) |
| - 3 doses mRNA-1273                                 | 0.43 (0.38-0.49) | <0.0001 | 369                      |
| - 3 doses BNT162b2                                  | 0.65 (0.59-0.71) | <0.0001 | 1051                     |
| - 2 doses mRNA-1273                                 | 0.84 (0.74-0.95) | 0.0043  | 367                      |
| - 2 doses BNT162b2                                  | 1.06 (0.96-1.16) | 0.24    | 1039                     |
| Age Range (Reference Group: <31)                    |                  |         | (Ref: 820)               |
| - 31-50                                             | 1.12 (1.03-1.22) | 0.0076  | 1461                     |
| - 51-64                                             | 0.81 (0.73-0.89) | <0.0001 | 823                      |
| - 65+                                               | 0.61 (1.03-1.23) | <0.0001 | 630                      |
| Race (Reference: White)                             |                  |         | (Ref: 2792)              |
| - African-American/Black                            | 1.14 (1.03-1.26) | 0.0092  | 474                      |
| - Other                                             | 0.88 (0.80-0.98) | 0.015   | 468                      |
| Weighted Comorbidity Index (Reference: 0)           |                  |         | (Ref: 3015)              |
| - 1-2                                               | 1.03 (0.94-1.14) | 0.50    | 518                      |
| - 3-4                                               | 1.20 (1.00-1.44) | 0.056   | 130                      |
| - 5+                                                | 1.03 (0.80-1.31) | 0.82    | 71                       |
| Sex=Male (Reference: Female)                        | 0.87 (0.81-0.93) | <0.0001 | 1309 (Ref: 2425)         |
| Prior Infection=1 (Reference: No Prior Infection)   | 0.97 (0.86-1.09) | 0.57    | 296 (Ref: 3438)          |
| Prior Visits (Reference: 0)                         |                  |         | (Ref: 158)               |
| - 1                                                 | 1.56 (1.26-1.93) | <0.0001 | 183                      |
| - 2-5                                               | 2.26 (1.90-2.69) | <0.0001 | 845                      |
| - 6-10                                              | 3.44 (2.88-4.11) | <0.0001 | 853                      |
| - 11+                                               | 4.11 (3.42-4.93) | <0.0001 | 1695                     |
| Prior Negative Tests (Reference: 0)                 |                  |         | (Ref: 1680)              |
| - 1                                                 | 1.51 (1.38-1.64) | <0.0001 | 928                      |
| - 2-4                                               | 2.12 (1.93-2.32) | <0.0001 | 890                      |
| - 5+                                                | 3.57 (3.96-4.15) | <0.0001 | 236                      |
| Transplantation Status=1 (Reference: No Transplant) | 1.71 (1.15-2.54) | 0.0086  | 25 (Ref: 3709)           |

\*Patient population is immunocompetent individuals (N = 162 805). § Ref is used to indicate the reference group.

**Table S4. Results from Cox Regression for Vaccine Efficacy against Infection, Immunosuppressed Individuals**

| Variable                                            | HR (95% CI)      | P-Value | No. Events     |
|-----------------------------------------------------|------------------|---------|----------------|
| Vaccine (Reference Group: Unvaccinated)             |                  |         | (Ref: 72)      |
| - 3 doses mRNA-1273                                 | 0.40 (0.27-0.58) | <0.0001 | 49             |
| - 3 doses BNT162b2                                  | 0.50 (0.36-0.69) | <0.0001 | 96             |
| - 2 doses mRNA-1273                                 | 0.43 (0.26-0.71) | 0.0011  | 19             |
| - 2 doses BNT162b2                                  | 0.87 (0.61-1.23) | 0.43    | 57             |
| Age Range (Reference Group: <31)                    |                  |         | (Ref: 33)      |
| - 31-50                                             | 1.24 (0.83-1.83) | 0.29    | 106            |
| - 51-64                                             | 0.88 (0.51-1.18) | 0.23    | 76             |
| - 65+                                               | 0.75 (0.48-1.15) | 0.19    | 68             |
| Race (Reference: White)                             |                  |         | (Ref: 217)     |
| - African-American/Black                            | 1.19 (0.87-1.63) | 0.29    | 51             |
| - Other                                             | 0.96 (0.63-1.45) | 0.83    | 25             |
| Weighted Comorbidity Index (Reference: 0)           |                  |         | (Ref: 118)     |
| - 1-2                                               | 1.02 (0.76-1.36) | 0.90    | 103            |
| - 3-4                                               | 1.24 (0.83-1.87) | 0.29    | 40             |
| - 5+                                                | 1.22 (0.78-1.91) | 0.38    | 32             |
| Sex=Male (Reference: Female)                        | 0.99 (0.78-1.27) | 0.94    | 109 (Ref: 184) |
| Prior Infection=1 (Reference: No Prior Infection)   | 1.01 (0.73-1.40) | 0.96    | 46 (Ref: 247)  |
| Prior Visits (Reference: 6-10)*                     |                  |         | (Ref: 28)      |
| - 0                                                 | 1.54 (0.46-5.15) | 0.48    | 3              |
| - 1                                                 | 0.36 (0.05-2.65) | 0.32    | 1              |
| - 2-5                                               | 0.95 (0.52-1.75) | 0.88    | 17             |
| - 11+                                               | 1.32 (0.86-2.01) | 0.20    | 244            |
| Prior Negative Tests (Reference: 0)                 |                  |         | (Ref: 76)      |
| - 1                                                 | 1.19 (0.83-1.72) | 0.34    | 53             |
| - 2-4                                               | 1.86 (1.34-2.59) | 0.00024 | 102            |
| - 5+                                                | 2.55 (1.72-3.78) | <0.0001 | 62             |
| Transplantation Status=1 (Reference: No Transplant) | 1.80 (1.31-2.48) | 0.00027 | 57 (Ref: 236)  |

\*6-10 coded as reference as very few immunosuppressed individuals had 0 prior visits so interpretation of hazard ratio relative to this group was too uncertain to be meaningful. Patient population is immunosuppressed individuals (N = 5609).

**Table S5. Results from Cox Regression for Vaccine Efficacy against Hospitalisation, Immunocompetent Individuals\***

| Variable                                            | HR (95% CI)       | P-Value | No. Events    |
|-----------------------------------------------------|-------------------|---------|---------------|
| Vaccine (Reference Group: Unvaccinated)             |                   |         | (Ref: 71)     |
| - 3 doses                                           | 0.08 (0.05-0.13)  | <0.0001 | 29            |
| - 2 doses                                           | 0.32 (0.22-0.47)  | <0.0001 | 44            |
| Age Range (Reference Group: <31)                    |                   |         | (Ref: 19)     |
| - 31-50                                             | 0.85 (0.47-1.56)  | 0.62    | 25            |
| - 51-64                                             | 1.49 (0.83-2.69)  | 0.18    | 32            |
| - 65+                                               | 2.90 (1.64-5.11)  | 0.00024 | 68            |
| Race (Reference: White)                             |                   |         | (Ref: 96)     |
| - African-American/Black                            | 1.77 (1.14-2.73)  | 0.011   | 27            |
| - Other                                             | 1.66 (1.03-2.68)  | 0.038   | 21            |
| Weighted Comorbidity Index (Reference: 0)           |                   |         | (Ref: 70)     |
| - 1-2                                               | 2.10 (1.32-3.32)  | 0.0016  | 34            |
| - 3-4                                               | 5.22 (3.04-8.95)  | <0.0001 | 26            |
| - 5+                                                | 4.22 (2.18-8.17)  | <0.0001 | 14            |
| Sex=Male (Reference: Female)                        | 1.02 (0.73-1.43)  | 0.91    | 61 (Ref: 83)  |
| Prior Infection=1 (Reference: No Prior Infection)   | 0.82 (0.47-1.42)  | 0.47    | 15 (Ref: 129) |
| Prior Visits (Reference: 0)                         |                   |         | (Ref: 14)     |
| - 1                                                 | 0.36 (0.10-1.26)  | 0.11    | 3             |
| - 2-5                                               | 0.50 (0.23-1.10)  | 0.086   | 12            |
| - 6-10                                              | 1.07 (0.51-2.27)  | 0.86    | 18            |
| - 11+                                               | 2.17 (1.06-4.48)  | 0.035   | 97            |
| Prior Negative Tests (Reference: 0)                 |                   |         | (Ref: 55)     |
| - 1                                                 | 1.35 (0.82-2.21)  | 0.24    | 30            |
| - 2-4                                               | 1.63 (0.98-2.70)  | 0.059   | 35            |
| - 5+                                                | 3.97 (2.20-7.16)  | <0.0001 | 24            |
| Transplantation Status=1 (Reference: No Transplant) | 4.77 (2.05-11.07) | 0.00028 | 6 (Ref: 138)  |

\*Patient population is immunocompetent individuals (N = 162 805).



**Table S6. Results from Cox Regression for Vaccine Efficacy against Hospitalisation, Immunosuppressed Individuals\***

| Variable                                            | HR (95% CI)      | P-Value | No. Events   |
|-----------------------------------------------------|------------------|---------|--------------|
| Vaccine (Reference Group: Unvaccinated)             |                  |         | (Ref: 21)    |
| - 3 doses                                           | 0.13 (0.07-0.26) | <0.0001 | 19           |
| - 2 doses                                           | 0.15 (0.06-0.38) | <0.0001 | 6            |
| Age >= 65 (Reference Group: <65)                    | 2.51 (1.33-4.74) | 0.0044  | 21 (Ref: 25) |
| Race=African-American/Black (Reference: All Others) | 2.35 (1.23-4.50) | 0.010   | 14 (Ref: 32) |
| Prior Visits >= 15 (Reference: <15)                 | 3.23 (1.20-8.70) | 0.021   | 41 (Ref: 5)  |
| PriorTest >= 1 (Reference: 0)                       | 3.45 (1.29-9.19) | 0.013   | 41 (Ref: 5)  |
| Transplantation Status=1 (Reference: No Transplant) | 3.82 (2.08-7.02) | <0.0001 | 17 (Ref: 29) |
| Sex=Male (Reference: Female)                        | 0.93 (0.51-1.71) | 0.83    | 19 (Ref: 27) |

\*Covariate categories simplified due to difficulties with estimation given lower sample size (number of events). Patient population is immunosuppressed individuals (N = 5609).

**Table S7. Results from Cox Regression for Medication Type and Infection Risk**

| Variable                                            | HR (95% CI)      | P-Value | No. Events       |
|-----------------------------------------------------|------------------|---------|------------------|
| Medication (Reference Group: No Medication)         |                  |         | (Ref: 3734)      |
| - Glucocorticoid                                    | 1.48 (1.21-1.80) | 0.00013 | 104              |
| - Immunosuppressive DMARD                           | 1.39 (1.13-1.72) | 0.0022  | 97               |
| - Immunomodulatory DMARD                            | 1.04 (0.72-1.49) | 0.85    | 29               |
| - Combination                                       | 1.58 (1.21-2.06) | 0.00077 | 63               |
| Vaccine (Reference Group: Unvaccinated)             |                  |         | (Ref: 980)       |
| - 3 doses mRNA-1273                                 | 0.43 (0.39-0.49) | <0.0001 | 418              |
| - 3 doses BNT162b2                                  | 0.64 (0.58-0.70) | <0.0001 | 1147             |
| - 2 doses mRNA-1273                                 | 0.80 (0.71-0.90) | 0.00026 | 386              |
| - 2 doses BNT162b2                                  | 1.04 (0.96-1.14) | 0.34    | 1096             |
| Age Range (Reference Group: <31)                    |                  |         | (Ref: 853)       |
| - 31-50                                             | 1.13 (1.04-1.23) | 0.0043  | 1567             |
| - 51-64                                             | 0.80 (0.73-0.88) | <0.0001 | 899              |
| - 65+                                               | 0.62 (0.55-0.69) | <0.0001 | 708              |
| Race (Reference: White)                             |                  |         | (Ref: 3009)      |
| - African-American/Black                            | 1.14 (1.04-1.25) | 0.0067  | 525              |
| - Other                                             | 0.89 (0.81-0.98) | 0.015   | 493              |
| Weighted Comorbidity Index (Reference: 0)           |                  |         | (Ref: 3133)      |
| - 1-2                                               | 1.03 (0.93-1.13) | 0.59    | 621              |
| - 3-4                                               | 1.20 (1.01-1.41) | 0.035   | 170              |
| - 5+                                                | 1.06 (0.86-1.30) | 0.61    | 103              |
| Sex=Male (Reference: Female)                        | 0.88 (0.82-0.94) | 0.00013 | 1418 (Ref: 2609) |
| Prior Infection=1 (Reference: No Prior Infection)   | 0.97 (0.86-1.08) | 0.56    | 342 (Ref: 3685)  |
| Prior Visits (Reference: 0)                         |                  |         | (Ref: 161)       |
| - 1                                                 | 1.54 (1.24-1.90) | <0.0001 | 184              |
| - 2-5                                               | 2.26 (1.90-2.68) | <0.0001 | 862              |
| - 6-10                                              | 3.42 (2.87-4.08) | <0.0001 | 881              |
| - 11+                                               | 4.10 (3.43-4.90) | <0.0001 | 1939             |
| Prior Negative Tests (Reference: 0)                 |                  |         | (Ref: 1756)      |
| - 1                                                 | 1.49 (1.37-1.62) | <0.0001 | 981              |
| - 2-4                                               | 2.11 (1.92-2.31) | <0.0001 | 992              |
| - 5+                                                | 3.40 (2.95-3.91) | <0.0001 | 298              |
| Transplantation Status=1 (Reference: No Transplant) | 1.70 (1.33-2.18) | <0.0001 | 82 (Ref: 3945)   |

**Table S8. Results from Cox Regression for Medication Type and Hospitalisation Risk**

| Variable                                            | HR (95% CI)      | P-Value | No. Events    |
|-----------------------------------------------------|------------------|---------|---------------|
| Medication (Reference Group: No Medication)         |                  |         | (Ref: 144)    |
| - Glucocorticoid                                    | 2.93 (1.77-4.86) | <0.0001 | 19            |
| - Immunosuppressive DMARD                           | 2.32 (1.23-4.38) | 0.0097  | 14            |
| - Immunomodulatory DMARD                            | 2.02 (0.64-6.37) | 0.23    | 3             |
| - Combination                                       | 1.90 (0.90-4.01) | 0.09    | 10            |
| Vaccine (Reference Group: Unvaccinated)             |                  |         | (Ref: 92)     |
| - 3 doses mRNA-1273                                 | 0.08 (0.04-0.14) | <0.0001 | 15            |
| - 3 doses BNT162b2                                  | 0.11 (0.07-0.16) | <0.0001 | 33            |
| - 2 doses mRNA-1273                                 | 0.21 (0.12-0.37) | <0.0001 | 14            |
| - 2 doses BNT162b2                                  | 0.33 (0.22-0.49) | <0.0001 | 36            |
| Age Range (Reference Group: <31)                    |                  |         | (Ref: 21)     |
| - 31-50                                             | 1.05 (0.61-1.81) | 0.86    | 36            |
| - 51-64                                             | 1.63 (0.95-2.80) | 0.077   | 44            |
| - 65+                                               | 3.23 (1.91-5.47) | <0.0001 | 89            |
| Race (Reference: White)                             |                  |         | (Ref: 125)    |
| - African-American/Black                            | 1.84 (1.28-2.65) | 0.0010  | 41            |
| - Other                                             | 1.51 (0.97-2.35) | 0.067   | 24            |
| Weighted Comorbidity Index (Reference: 0)           |                  |         | (Ref: 82)     |
| - 1-2                                               | 1.86 (1.24-2.79) | 0.0027  | 49            |
| - 3-4                                               | 4.05 (2.52-6.51) | <0.0001 | 39            |
| - 5+                                                | 2.90 (1.63-5.17) | 0.0010  | 20            |
| Sex=Male (Reference: Female)                        | 1.01 (0.75-1.35) | 0.96    | 80 (Ref: 110) |
| Prior Infection=1 (Reference: No Prior Infection)   | 0.89 (0.57-1.39) | 0.62    | 24 (Ref: 166) |
| Prior Visits (Reference: 0)                         |                  |         | (Ref: 14)     |
| - 1                                                 | 0.48 (0.16-1.46) | 0.19    | 4             |
| - 2-5                                               | 0.48 (0.22-1.05) | 0.068   | 12            |
| - 6-10                                              | 1.11 (0.54-2.28) | 0.78    | 21            |
| - 11+                                               | 2.10 (1.05-4.21) | 0.036   | 139           |
| Prior Negative Tests (Reference: 0)                 |                  |         | (Ref: 60)     |
| - 1                                                 | 1.50 (0.95-2.37) | 0.079   | 37            |
| - 2-4                                               | 1.91 (1.21-3.01) | 0.0051  | 49            |
| - 5+                                                | 4.78 (2.90-7.90) | <0.0001 | 44            |
| Transplantation Status=1 (Reference: No Transplant) | 3.52 (2.01-6.16) | <0.0001 | 23 (Ref: 167) |

**Table S9. Results from Cox Regression for Vaccine Efficacy against ICU Admission, All Patients\***

| Variable                                | HR (95% CI)      | P-Value | No. Events   |
|-----------------------------------------|------------------|---------|--------------|
| Vaccine (Reference Group: Unvaccinated) |                  |         | (Ref: 16)    |
| - 3 doses                               | 0.09 (0.03-0.25) | <0.0001 | 6            |
| - 2 doses                               | 0.08 (0.02-0.34) | 0.00065 | 2            |
| Age >= 65 (Reference Group: <65)        | 3.82 (1.58-9.19) | 0.00028 | 12 (Ref: 12) |
| Comorbidity Index >= 1 (Reference: 0)   | 3.99 (1.66-9.60) | 0.00020 | 10 (Ref: 14) |

\*Covariate categories simplified due to difficulties with estimation given lower sample size (number of events).

**Table S10. Characteristics of Infected Patients**

|                                                    | Immunocompetent<br>(N=3930) |                        | Immunosuppressed<br>(N=315) |                       |
|----------------------------------------------------|-----------------------------|------------------------|-----------------------------|-----------------------|
|                                                    | Unvaccinated<br>(N=872)     | Vaccinated<br>(N=3058) | Unvaccinated<br>(N=73)      | Vaccinated<br>(N=242) |
| Age Median (IQR)                                   | 42 (30-57)                  | 45 (32-59)             | 51 (36-59)                  | 53 (40-67)            |
| Sex No. (%)                                        |                             |                        |                             |                       |
| - Male                                             | 295 (34)                    | 1069 (35)              | 29 (40)                     | 87 (36)               |
| - Female                                           | 577 (66)                    | 1989 (65)              | 44 (60)                     | 155 (64)              |
| Race No. (%)                                       |                             |                        |                             |                       |
| - Caucasian                                        | 640 (73)                    | 2327 (76)              | 47 (64)                     | 188 (78)              |
| - African American                                 | 173 (20)                    | 340 (11)               | 20 (27)                     | 35 (14)               |
| - Asian                                            | 21 (2)                      | 243 (8)                | 3 (4)                       | 7 (3)                 |
| - American Indian or<br>Alaska Native              | 0 (0)                       | 13 (0.4)               | 0 (0)                       | 0 (0)                 |
| - Native Hawaiian<br>and Other Pacific<br>Islander | 2 (0.2)                     | 2 (0.1)                | 0 (0)                       | 0 (0)                 |
| - Other                                            | 36 (4)                      | 133 (4)                | 3 (4)                       | 12 (5)                |
| Weighted Comorbidity Index                         |                             |                        |                             |                       |
| - 0                                                | 739 (85)                    | 2432 (80)              | 42 (58)                     | 84 (35)               |
| - 1-2                                              | 102 (12)                    | 448 (15)               | 20 (27)                     | 94 (39)               |
| - 3-4                                              | 23 (3)                      | 114 (4)                | 9 (12)                      | 34 (14)               |
| - ≥5                                               | 8 (1)                       | 64 (2)                 | 2 (3)                       | 30 (12)               |
| Medication Type No. (%)                            |                             |                        |                             |                       |
| - None                                             | 872 (100)                   | 3058 (100)             | NA                          | NA                    |
| - Glucocorticoid                                   | NA                          | NA                     | 34 (47)                     | 80 (33)               |
| - Immunosuppressive<br>DMARD                       | NA                          | NA                     | 19 (26)                     | 83 (34)               |
| - Immunomodulatory<br>DMARD                        | NA                          | NA                     | 4 (5)                       | 26 (11)               |
| - Multiple Types                                   | NA                          | NA                     | 16 (22)                     | 53 (22)               |
| Transplantation Patients No.<br>(%)                | 4 (0.5)                     | 21 (0.6)               | 13 (18.0)                   | 48 (20.0)             |

**Table S11. Characteristics of Hospitalised Patients**

|                                                    | Immunocompetent<br>(N=156) |                      | Immunosuppressed<br>(N=47) |                      |
|----------------------------------------------------|----------------------------|----------------------|----------------------------|----------------------|
|                                                    | Unvaccinated<br>(N=62)     | Vaccinated<br>(N=94) | Unvaccinated<br>(N=20)     | Vaccinated<br>(N=27) |
| Age Median (IQR)                                   | 53 (33-68)                 | 69 (53-79)           | 54 (46-65)                 | 68 (54-74)           |
| Sex No. (%)                                        |                            |                      |                            |                      |
| - Male                                             | 20 (32)                    | 43 (46)              | 8 (40)                     | 11 (41)              |
| - Female                                           | 42 (68)                    | 51 (54)              | 12 (60)                    | 16 (59)              |
| Race No. (%)                                       |                            |                      |                            |                      |
| - Caucasian                                        | 40 (65)                    | 67 (71)              | 8 (40)                     | 21 (78)              |
| - African American                                 | 14 (23)                    | 16 (17)              | 10 (50)                    | 5 (19)               |
| - Asian                                            | 2 (3)                      | 3 (3)                | 2 (10)                     | 1 (4)                |
| - American Indian or<br>Alaska Native              | 0 (0)                      | 1 (1)                | 0 (0)                      | 0 (0)                |
| - Native Hawaiian<br>and Other Pacific<br>Islander | 0 (0)                      | 0 (0)                | 0 (0)                      | 0 (0)                |
| - Other                                            | 6 (10)                     | 7 (7)                | 0 (0)                      | 0 (0)                |
| Weighted Comorbidity Index                         |                            |                      |                            |                      |
| - 0                                                | 42 (68)                    | 31 (33)              | 8 (40)                     | 4 (15)               |
| - 1-2                                              | 14 (23)                    | 25 (27)              | 6 (30)                     | 10 (37)              |
| - 3-4                                              | 6 (10)                     | 24 (26)              | 5 (25)                     | 8 (30)               |
| - ≥5                                               | 0 (0)                      | 14 (15)              | 1 (5)                      | 5 (19)               |
| Medication Type No. (%)                            |                            |                      |                            |                      |
| - None                                             | 62 (100)                   | 94 (100)             | NA                         | NA                   |
| - Glucocorticoid                                   | NA                         | NA                   | 10 (50)                    | 10 (37)              |
| - Immunosuppressive<br>DMARD                       | NA                         | NA                   | 3 (15)                     | 11 (41)              |
| - Immunomodulatory<br>DMARD                        | NA                         | NA                   | 1 (5)                      | 2 (7)                |
| - Multiple Types                                   | NA                         | NA                   | 6 (30)                     | 4 (15)               |
| Transplantation Patients No.<br>(%)                | 2 (3.2)                    | 4 (4.3)              | 7 (35.0)                   | 10 (37.0)            |

**Figure S1. Unweighted Balance for all Covariates**

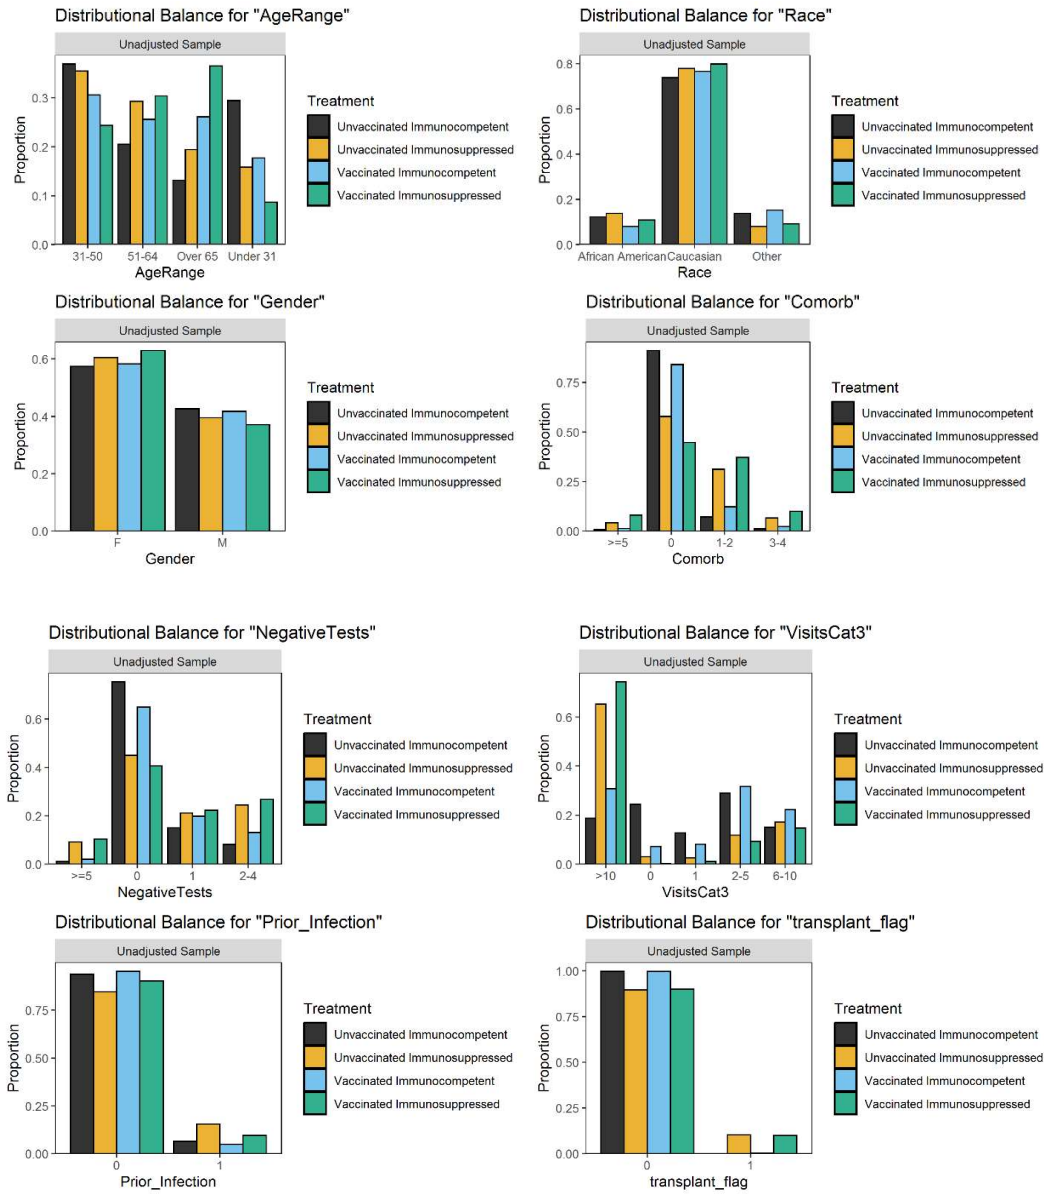

**Figure S2. Weighted Balance for all Covariates**

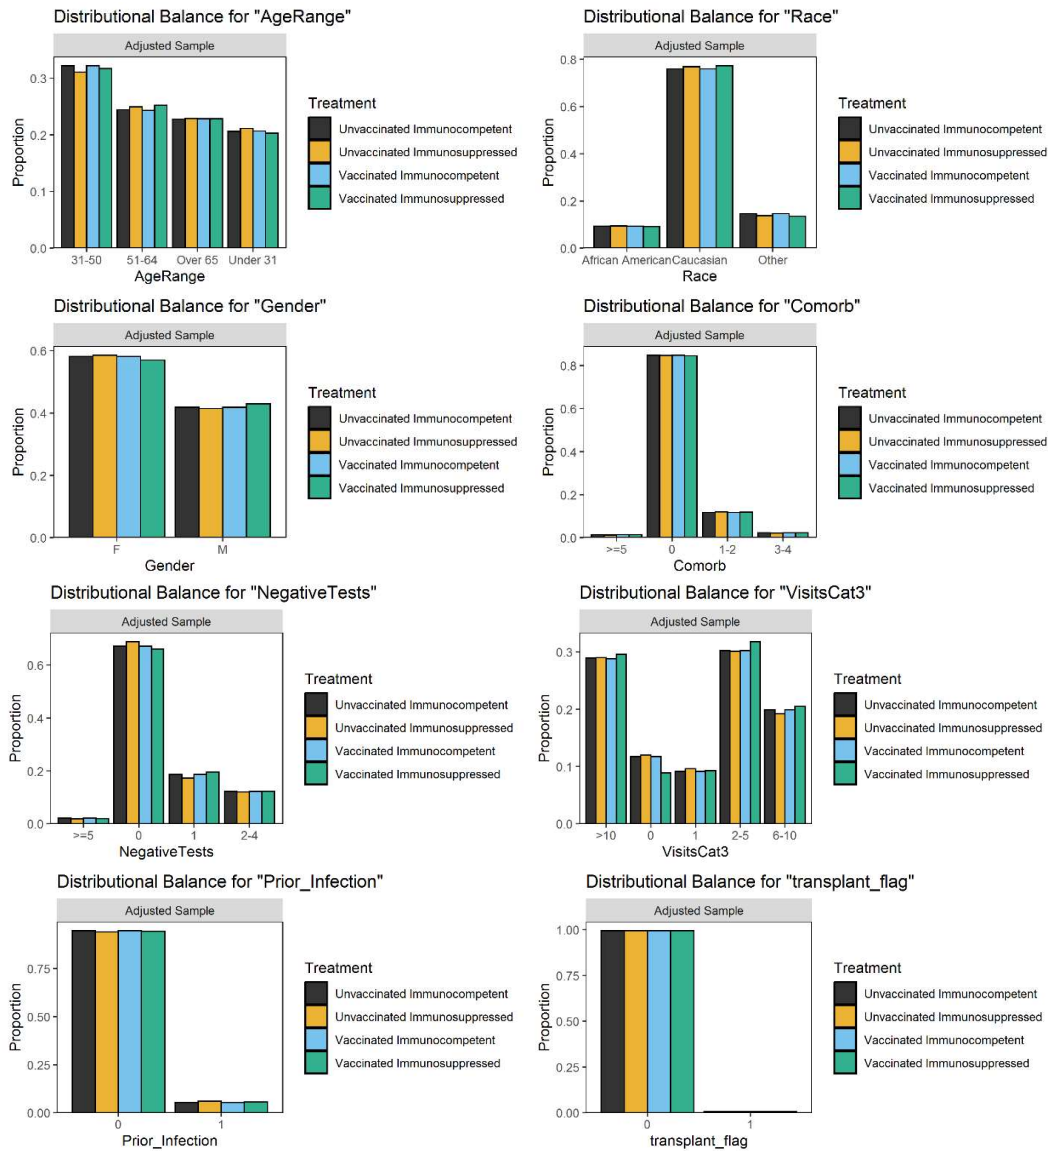

Supplement: mmc1.pdf [file mmc1.pdf]
